# Supplementary material for: Two isomorphous coordination polymer-derived metal oxides as high-performance anodes for lithium-ion batteries
Source: Royal Society of Chemistry journal article supplement (doi:10.1039/c7nj00540g), 2017-01-01
Supplement: c7nj00540g1.pdf [file c7nj00540g1.pdf]

## Two isomorphous coordination polymers derived metal oxides as high performance anodes for lithium-ion batteries

Wei-Wei Shi, Han Zhang, Xiang-Yu Zheng, Shuai-Feng Lou, Bo-Wen Hu\*, Ge-Ping Yin and Yun-Zhi Gao\*

Thermal analyses of compounds **1** and **2** were performed in the temperature range of 30-800 °C on a NETZSCH STA 449F3 analyzer in air with an increasing temperature rate of 10 °C/min.

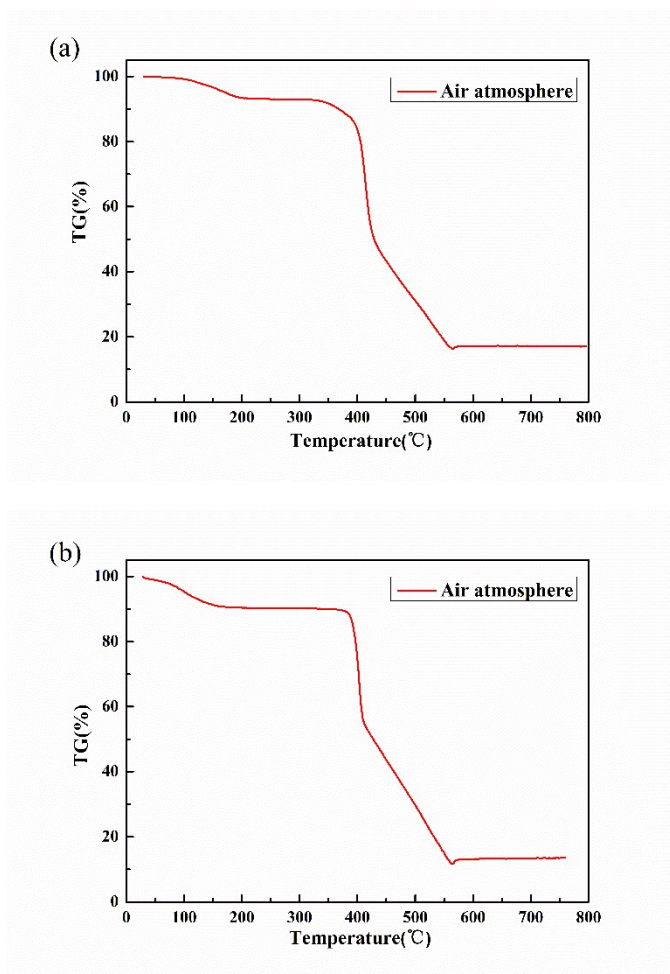

Fig. 15 TGA analysis of (a) compound **1** and (b) compound **2**

Nitrogen adsorption-desorption isotherms were obtained from the N<sub>2</sub> physisorption at 77K using 3H-2000PS1 nitrogen adsorption apparatus. The Brunauer-Emmett-Teller (BET) specific surface areas ( $S_{\text{BET}}$ ) were calculated using the BET equation, and the pore size were calculated by desorption isotherm using the Barret-Joyner-Halender (BJH) method. And it can be calculated that the BET specific surface area are 16.1 m<sup>2</sup>/g and 7.3 m<sup>2</sup>/g. The pore size distribution (PSD) plots calculated from the desorption branches of the nitrogen sorption isotherms. According to the PSD curves, the cumulative pore volume of the compounds **1** and **2** are 0.1 ml/g and 0.07 ml/g, the average pore diameter are 17.3 nm and 16.9 nm, respectively.

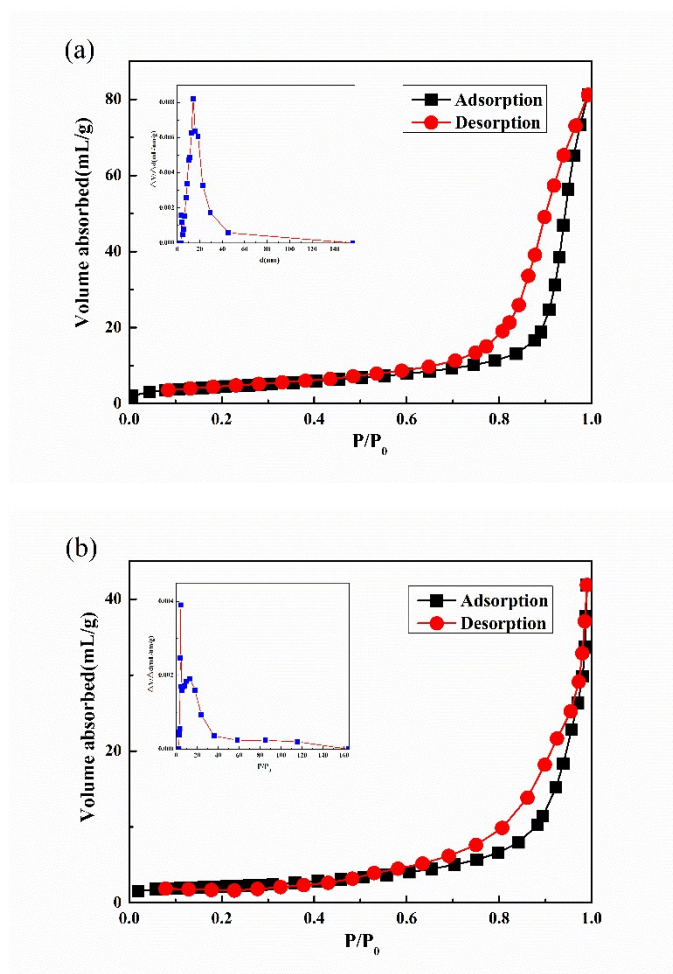

Fig. 2S Nitrogen adsorption-desorption isotherms and corresponding pore size distribution curves of the (a) compound 1 and (b) compound 2

It can be calculated that the BET specific surface area are 3.7 m<sup>2</sup>/g and 9.8 m<sup>2</sup>/g of Co<sub>3</sub>O<sub>4</sub> and NiO. The pore size distribution (PSD) plots calculated from the desorption branches of the nitrogen sorption isotherms. According to the PSD curves, the cumulative pore volume of Co<sub>3</sub>O<sub>4</sub> and NiO are 0.15 ml/g and 0.19 ml/g, the average pore diameter are 51.2 nm and 21.3 nm, respectively.

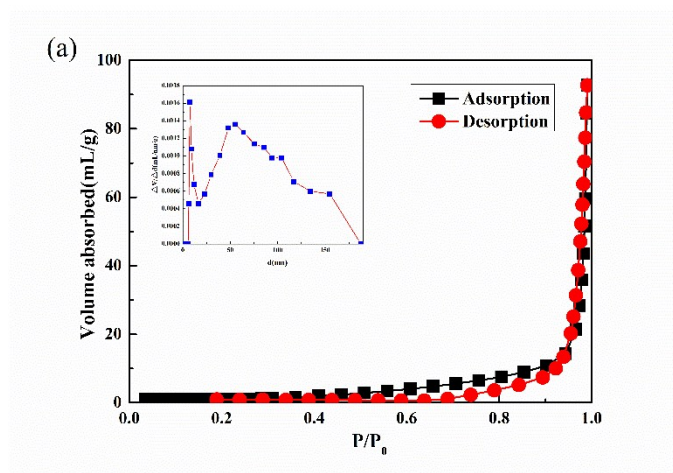

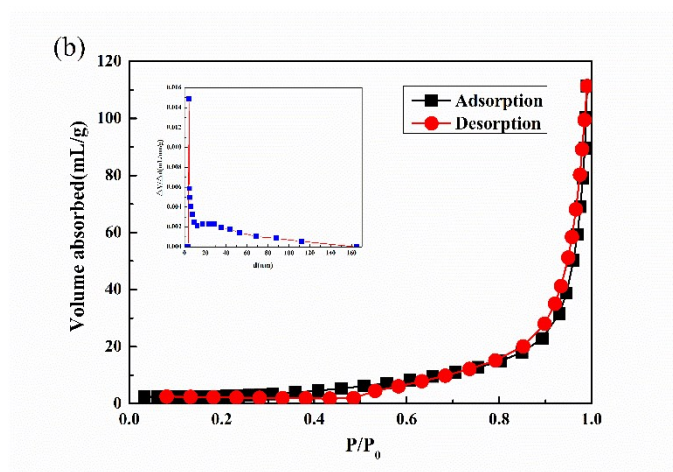

Fig. 35 Nitrogen adsorption-desorption isotherms and corresponding pore size distribution curves of the (a)  $\text{Co}_3\text{O}_4$  and (b) NiO

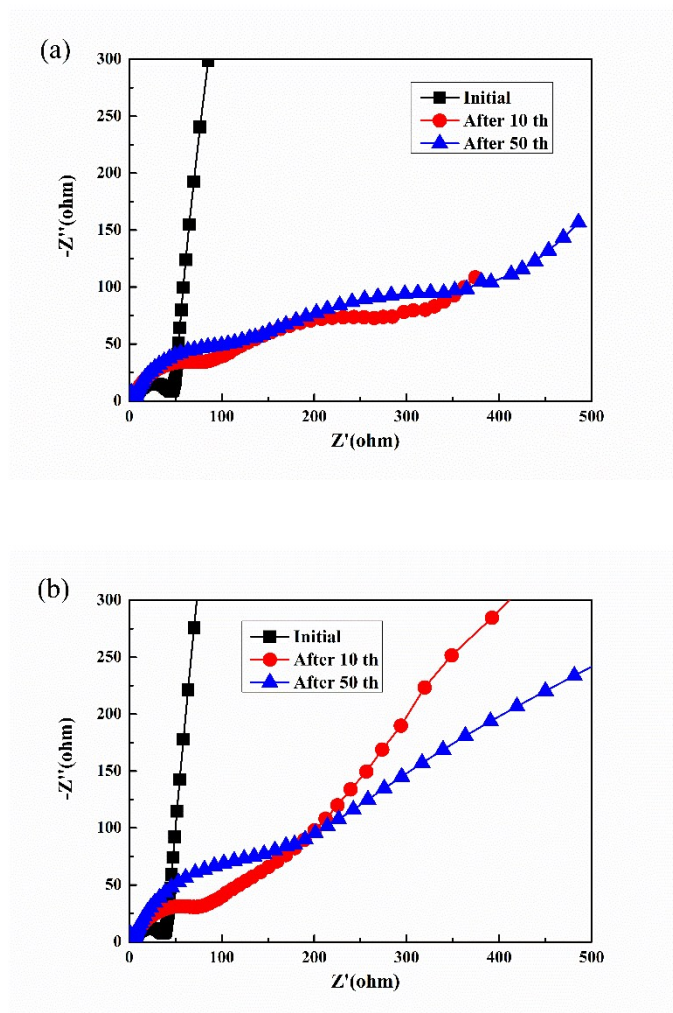

Fig. 45 Electrochemical impedance spectra (EIS) of the (a)  $\text{Co}_3\text{O}_4$  electrode and (b) NiO electrode at 2000 mA/g after different cycles

## Electronic Supplementary Material (ESI) for New Journal of Chemistry

Table 1S Selected bond distances (Å) and angles (deg) for compound 1.

|                                              |            |                                              |            |
|----------------------------------------------|------------|----------------------------------------------|------------|
| Co(1)-N(1)                                   | 2.1128(18) | Co(1)-N(1) <sup>#1</sup>                     | 2.1129(18) |
| Co(1)-O(2) <sup>#2</sup>                     | 2.1084(15) | Co(1)-O(1) <sup>#3</sup>                     | 2.1964(15) |
| O(2) <sup>#2</sup> -Co(1)-N(1)               | 94.19(7)   | N(1) <sup>#1</sup> -Co(1)-O(1) <sup>#3</sup> | 93.99(7)   |
| O(2) <sup>#3</sup> -Co(1)-N(1)               | 102.70(7)  | O(2) <sup>#2</sup> -Co(1)-O(1) <sup>#3</sup> | 101.06(6)  |
| O(2) <sup>#2</sup> -Co(1)-O(1) <sup>#2</sup> | 61.19(6)   | N(1)-Co(1)-N(1) <sup>#1</sup>                | 87.68(10)  |

\* Symmetry mode: #1 -x+1,y,-z+3/2; #2 -x+3/2,y+1/2,-z+3/2; #3 x-1/2,y+1/2,z
